# Supplementary material
Source: PubMed Central journal article supplement (PMC6318815)
Supplement: mmc1.pdf [file mmc1.pdf]

**YMTHE, Volume 27**

## **Supplemental Information**

### **Efficacy of Multi-exon Skipping Treatment**

### **in Duchenne Muscular Dystrophy Dog**

### **Model Neonates**

**Kenji Rowel Q. Lim, Yusuke Echigoya, Tetsuya Nagata, Mutsuki Kuraoka, Masanori Kobayashi, Yoshitsugu Aoki, Terence Partridge, Rika Maruyama, Shin'ichi Takeda, and Toshifumi Yokota**

## Supplementary Figures and Table

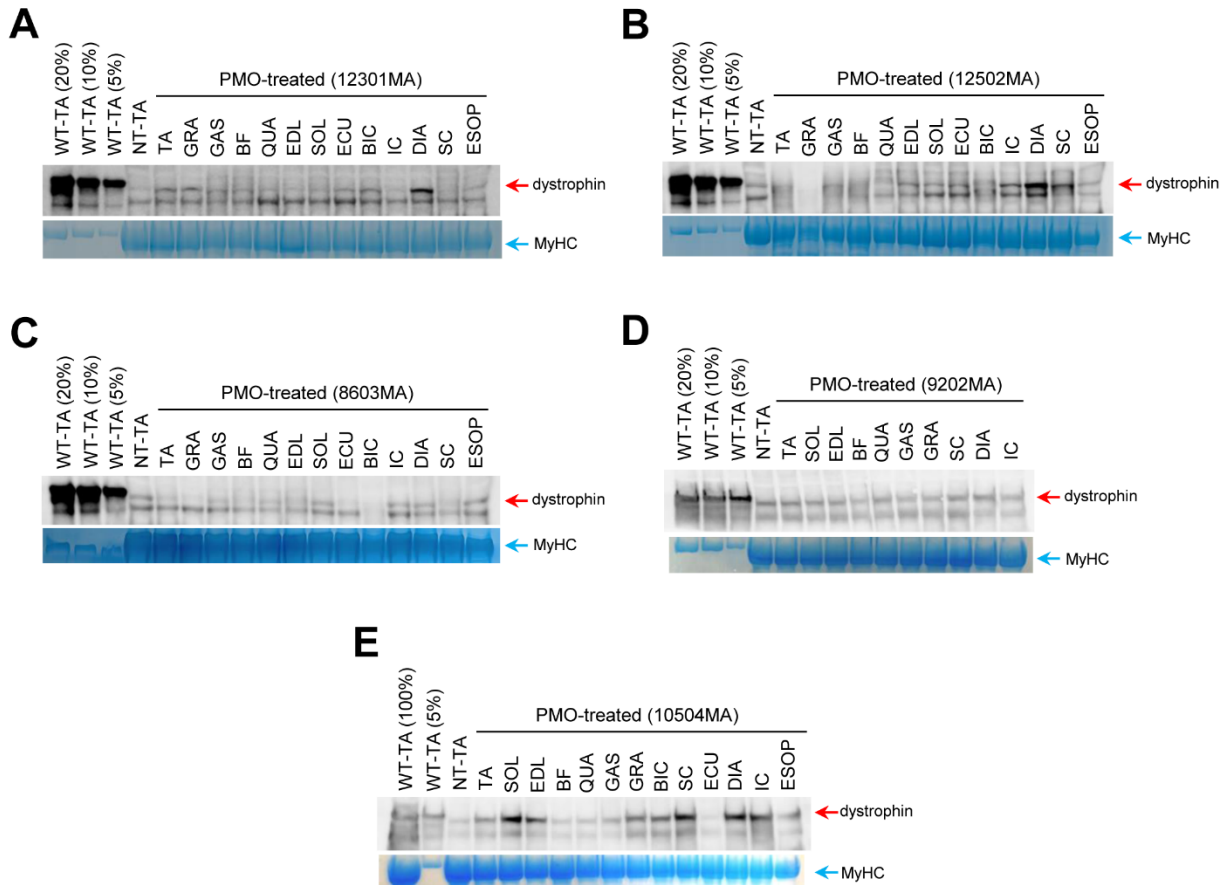

**Figure S1. Dystrophin Western blot results for other treated CXMD<sub>j</sub> neonatal dogs.** Images showing dystrophin protein rescue in (A) 12301MA, (B) 12502MA, (C) 8603MA, (D) 9202MA, and (E) 10504MA. Myosin heavy chain (MyHC) is shown as a loading control. For (A) to (C), 40  $\mu$ g protein was loaded for non-treated (NT) and treated muscles; for (D) and (E), 60  $\mu$ g was loaded instead. Wild-type (WT) samples were loaded at the indicated levels, as percentages of the amounts loaded for the treated muscles. Abbreviations: TA, tibialis anterior; GRA, gracilis major; GAS, gastrocnemius; BF, biceps femoris; QUA, quadriceps; EDL, extensor digitorum longus; SOL, soleus; ECU, extensor carpi ulnaris; BIC, biceps brachii; IC, intercostal muscles; DIA, diaphragm; SC, sternocleidomastoid; ESOP, esophagus.

PMO-treated (8603MA)

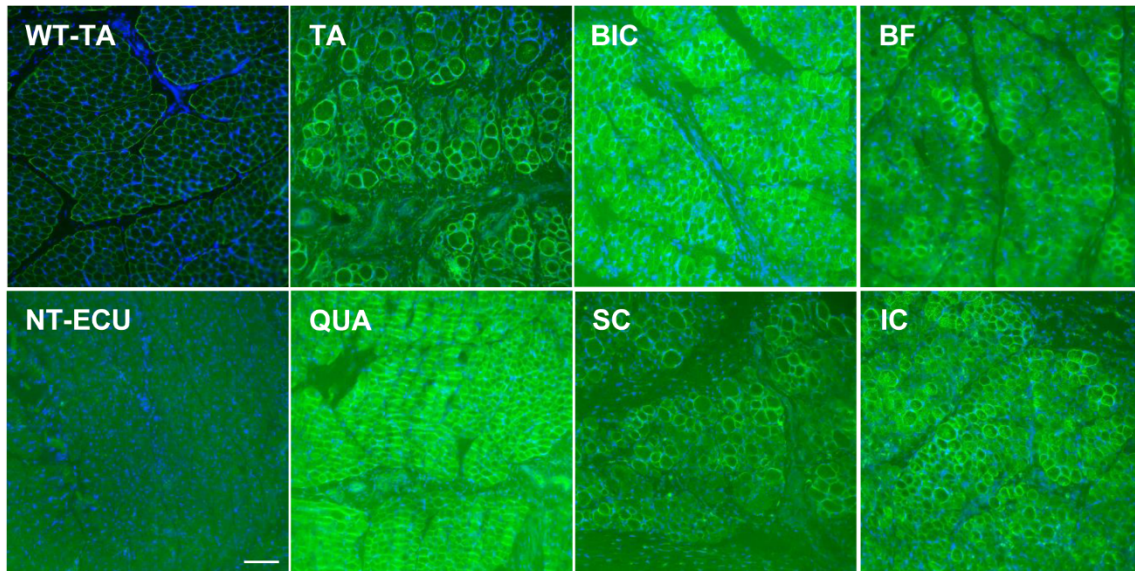

**Figure S2. Representative immunohistochemistry images of skeletal muscles from 8603MA, stained using DYS1.** Numerous dystrophin-positive fibers (green) can be observed in various skeletal muscles upon treatment; blue: nuclei. Total magnification: 200x; scale bar: 100  $\mu$ m. Abbreviations: TA, tibialis anterior; ECU, extensor carpi ulnaris; BIC, biceps brachii; BF, biceps femoris; QUA, quadriceps; SC, sternocleidomastoid; IC, intercostal muscles.

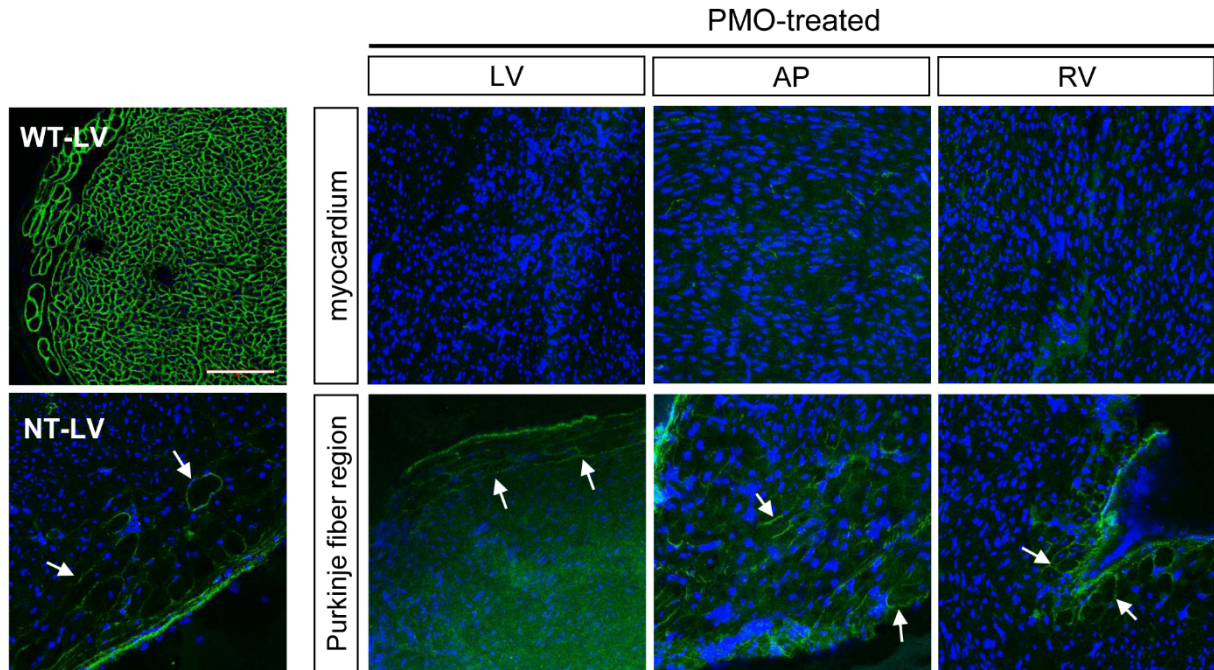

**Figure S3. Representative immunohistochemistry images of cardiac muscles detected with DYS2.** DYS2 is specific for the C-terminal domain of dystrophin. Dystrophin (green) can be detected in Purkinje fibers, as indicated by the white arrows, but not in the myocardium of treated CXMD<sub>J</sub> dog cardiac muscles; blue: nuclei. Total magnification: 200x; scale bar: 100 μm. n = 4 (PMO-treated dogs). Abbreviations: WT, wild-type; NT, non-treated; LV, left ventricle; AP, anterior papillary muscle; RV, right ventricle.

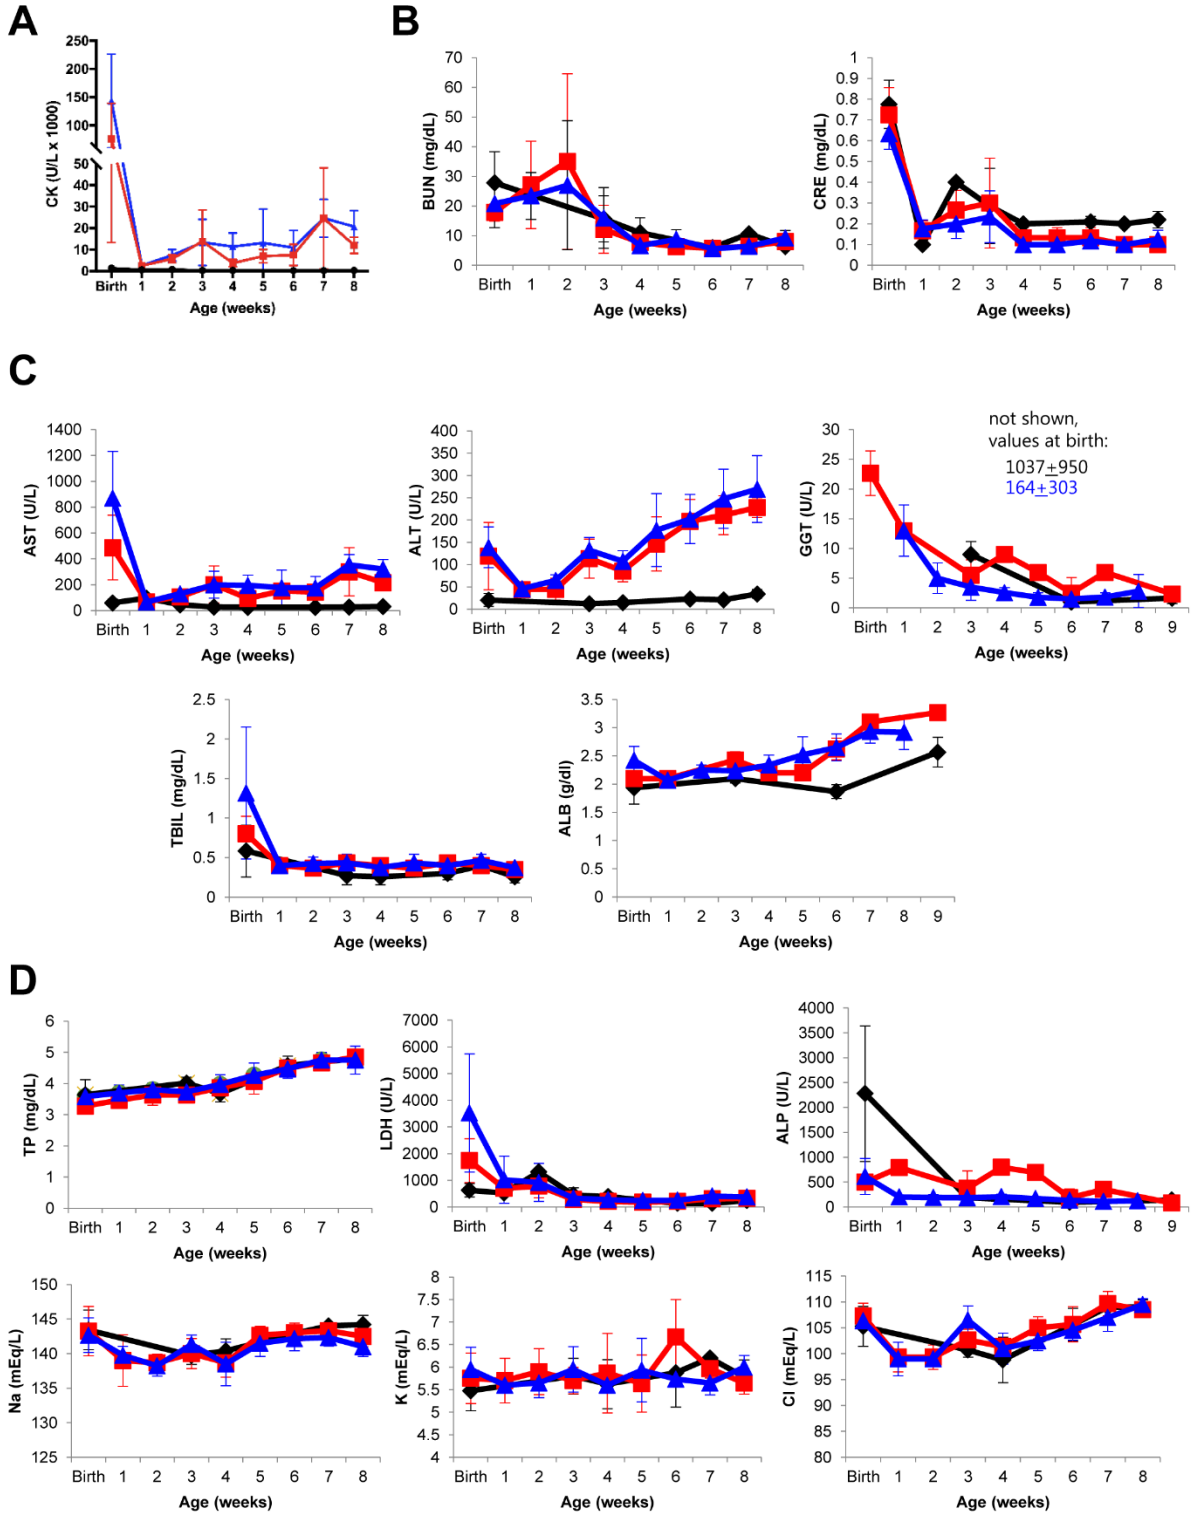

**Figure S4. Analysis of serum biomarkers from weekly blood tests in neonatal dogs. The levels of various serum biomarkers were analyzed in weekly samples collected from wild-type**

(black), non-treated CXMD<sub>1</sub> (red), and PMO-treated CXMD<sub>1</sub> (blue) dogs. (A) Creatine kinase (CK) levels. (B) Kidney damage marker levels: blood urea nitrogen (BUN), serum creatinine (CRE). (C) Liver damage marker levels: aspartate aminotransferase (AST), alanine aminotransferase (ALT), gamma-glutamyl transferase (GGT), total bilirubin (TBIL), serum albumin (ALB). (D) General marker levels: total protein (TP), lactate dehydrogenase (LDH), alkaline phosphatase (ALP), sodium (Na), potassium (K), chloride (Cl). Error bars: S.D. n = 1-12, wild-type; n = 3-4, non-treated; n = 4-6, treated.

**Table S1. Comprehensive list of dogs used in the study.**

| Dog ID* | Treatment group | Functional testing |         |               |                  | Molecular analyses** |                 | Histology | ELISA (serum, tissues) | Blood tests |
|---------|-----------------|--------------------|---------|---------------|------------------|----------------------|-----------------|-----------|------------------------|-------------|
|         |                 | Grading            | 15m run | Standing time | Open-mouth width | Skeletal muscles     | Cardiac muscles |           |                        |             |
| 8603MA  | Treated         |                    | X       |               |                  | X                    | X               | X         | X                      | X           |
| 9202MA  | Treated         | X                  | X       | X             | X                | X                    |                 | X         | X                      | X           |
| 10504MA | Treated         | X                  | X       | X             | X                | X                    |                 | X         | X                      | X           |
| 12301MA | Treated         | X                  | X       | X             | X                | X                    | X               | X         | X                      | X           |
| 12303MA | Treated         | X                  | X       | X             | X                | X                    | X               | X         | X                      | X           |
| 12502MA | Treated         | X                  | X       | X             | X                | X                    | X               | X         | X                      | X           |
| 8609MA  | Non-treated     |                    | X       |               |                  |                      |                 | X         |                        | X           |
| 9201MA§ | Non-treated     |                    |         |               |                  |                      |                 |           |                        | X           |
| 12305MA | Non-treated     | X                  | X       | X             | X                | X                    | X               | X         |                        | X           |
| 12501MA | Non-treated     | X                  | X       | X             | X                | X                    | X               | X         |                        | X           |
| 11403MA | Non-treated     | X                  | X       | X             |                  |                      |                 |           |                        |             |
| 402MA   | Non-treated     |                    |         |               |                  | X                    |                 | X         |                        |             |
| 2301MA  | Non-treated     |                    |         |               |                  |                      |                 | X         |                        |             |
| 3701MA  | Non-treated     |                    |         | X             | X                |                      |                 |           |                        |             |
| 5301FA  | Non-treated     |                    |         | X             | X                |                      |                 |           |                        |             |
| 5302FA  | Non-treated     |                    |         | X             | X                |                      |                 |           |                        |             |
| 5303MA  | Non-treated     |                    |         | X             | X                |                      |                 |           |                        |             |
| 5306MA  | Non-treated     |                    |         | X             | X                |                      |                 |           |                        |             |
| 5308FA  | Non-treated     |                    |         | X             | X                |                      |                 |           |                        |             |
| 8106MA  | Non-treated     |                    |         | X             | X                |                      |                 |           |                        |             |
| 11303MA | Non-treated     |                    |         | X             | X                |                      |                 |           |                        |             |
| 14804MA | Non-treated     |                    |         |               |                  |                      |                 |           |                        | X           |
| 15001MA | Non-treated     |                    |         |               |                  |                      |                 |           |                        | X           |
| 15002MA | Non-treated     |                    |         |               |                  |                      |                 |           |                        | X           |
| 8601MN  | Wild-type       |                    | X       |               |                  |                      |                 |           |                        | X           |
| 9203MN  | Wild-type       |                    | X       | X             | X                |                      |                 |           |                        |             |
| 10502MN | Wild-type       | X                  | X       | X             | X                | X                    | X               | X         |                        |             |
| 12302MN | Wild-type       | X                  | X       | X             | X                | X                    |                 | X         |                        |             |
| 12304MN | Wild-type       |                    |         |               |                  | X                    |                 | X         |                        |             |
| 12104MN | Wild-type       | X                  | X       | X             |                  |                      |                 |           |                        |             |
| 601MN   | Wild-type       |                    |         |               |                  |                      |                 | X         |                        |             |
| E09MN   | Wild-type       |                    |         |               |                  |                      |                 | X         |                        |             |
| 2303MN  | Wild-type       |                    |         |               |                  |                      |                 | X         |                        |             |
| 14003MN | Wild-type       |                    |         |               |                  |                      |                 |           |                        | X           |
| 14103MN | Wild-type       |                    |         |               |                  |                      |                 |           |                        | X           |
| 14104MN | Wild-type       |                    |         |               |                  |                      |                 |           |                        | X           |
| 14304MN | Wild-type       |                    |         |               |                  |                      |                 |           |                        | X           |
| 14402MN | Wild-type       |                    |         |               |                  |                      |                 |           |                        | X           |
| 14502MN | Wild-type       |                    |         |               |                  |                      |                 |           |                        | X           |
| 14504MN | Wild-type       |                    |         |               |                  |                      |                 |           |                        | X           |
| 14603MN | Wild-type       |                    |         |               |                  |                      |                 |           |                        | X           |
| 14701MN | Wild-type       |                    |         |               |                  |                      |                 |           |                        | X           |
| 14702MN | Wild-type       |                    |         |               |                  |                      |                 |           |                        | X           |
| 14703MN | Wild-type       |                    |         |               |                  |                      |                 |           |                        | X           |
| 14803MN | Wild-type       |                    |         |               |                  |                      |                 |           |                        | X           |

\*the two letters at the end of each ID: the first indicates sex (M/F), the second indicates genotype (N = normal, A = affected, with CXMD<sub>J</sub> mutation), \*\*molecular analyses include: RT-PCR, Western blotting, immunohistochemistry, §died prior to endpoint.
